# Supplementary material for: The Role of Sediment-induced Light Attenuation on Primary Production during Hurricane Gustav (2008)
Source: Copernicus journal article supplement (doi:10.5194/bg-2020-58), 2020-03-25
Supplement: Supplementary file [file bg-2020-58-RC1-supplement.pdf]

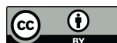

## 23 Abstract

24

25 We introduced a sediment-induced light attenuation algorithm into the biogeochemical model of  
26 the Coupled Ocean-Atmosphere-Wave-Sediment Transport (COAWST) modeling system. A fully  
27 coupled ocean-atmospheric-sediment-biogeochemical simulation was carried out to assess the  
28 impact of sediment-induced light attenuation on primary production in the northern Gulf of Mexico  
29 during Hurricane Gustav in 2008. The new model showed a better agreement with satellite data on  
30 both the magnitude of nearshore chlorophyll concentration and the distribution of offshore bloom.  
31 When Gustav approached, resuspended sediments shifted the inner shelf ecosystem from a  
32 nutrient-limited one to light-limited. One week after Gustav's landfall, accumulated nutrient and  
33 favorable optical environment induced a post-hurricane algal bloom in the top 20 m of water  
34 column, while the productivity in the lower layer was still light-limited due to unsettled sediment.  
35 Corresponding with the elevated offshore  $\text{NO}_3$  flux (38.71 mmol N/m/s) and decreased chlorophyll  
36 flux (43.10 mg/m/s), the post-hurricane bloom in the outer shelf was resulted from the cross-shelf  
37 nutrient supply instead of the lateral dispersed chlorophyll. Sensitivity tests indicated that sediment  
38 light attenuation efficiency affected primary production when sediment concentration was  
39 moderately high. The influence of terrestrial nutrient discharge on primary production was  
40 dominant after three days of hurricane landfall and kept increasing until the end of model  
41 simulation. Model uncertainties were also discussed.

42

## 43 1 Introduction

44

45 Light is the primary agent for photosynthesis and plays a vital role in marine ecosystems.  
46 The vertical structure of light availability in an aquatic environment is mainly modulated by the  
47 shading effects of chlorophyll, colored dissolved organic matter (CDOM), detritus, and sediment  
48 (Cloern, 1987; Devlin et al., 2008; Schaeffer et al., 2011; Ganju et al., 2014; McSweeney et al.,  
49 2017). The optical environments in river-dominated shelves are more complex due to the high  
50 spatiotemporal variations of light absorbers caused by the interaction between riverine inputs and  
51 regional hydrodynamics (Bierman et al., 1994; Lin et al., 2009; Zhu et al., 2009). As the largest  
52 river in North America, the Mississippi-Atchafalaya River system delivers 380 km<sup>3</sup> of freshwater  
53 and 115 Mt of sediments each year into the northern Gulf of Mexico (nGoM; Meade and Moody,  
54 2010; Allison et al., 2012). Over the Louisiana-Texas shelf in the nGoM, suspended sediment  
55 concentration (SSC) in the water column exhibits strong seasonality: SSC in winter and spring  
56 seasons is high due to strong sediment resuspension and large fluvial sediment discharge; while in  
57 summer and fall it is largely reduced owing to the relatively low river inputs and weak  
58 resuspension (Zang et al., 2019). Episodic hurricane events in summer and fall can disturb vertical  
59 stratification and resuspend large amount of sediment (D'Sa et al., 2011; Xu et al., 2016; Zang et  
60 al., 2018). Enhanced resuspension during a hurricane might greatly change the shelf ecosystem via  
61 modifying light availability, yet the related studies are limited due to the challenge of *in-situ* data  
62 collection under extreme weather conditions. In addition to light attenuation, another potential  
63 impact from resuspended sediment is enhanced organic matter remineralization in the bottom  
64 boundary layer (Wilson et al., 2013; Hurst et al., 2019), yet so far available field studies are still  
65 very limited.

66

67 As an alternative tool to fill the spatial and temporal gaps in *in-situ* datasets, coupled  
68 physical-biogeochemical models have been widely applied to the Gulf of Mexico (e.g. Fennel et  
al., 2008; Laurent et al., 2012; Xue et al., 2013; Yu et al., 2015; Gomez et al., 2018). Although  
most of these studies considered sediment-induced light attenuation when estimating primary

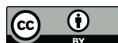

69 production, its influence remained unchanged over the entire research domain and did not vary  
70 with sediment dynamics. Such an oversimplified treatment of sediment-induced light attenuation  
71 could substantially impact models' robustness in river-dominated shelves that encompass a wide  
72 range of SSC. Justić and Wang (2014) tentatively employed a new scheme by connecting  
73 sediment-induced light attenuation with river discharge (salinity) and hydrodynamics (bottom  
74 shear stress) in the nGoM. However, the horizontal distribution of SSC in a realistic environment  
75 is not necessarily correlated with that of the freshwater plume, and the contribution of resuspension  
76 to SSC in different vertical layers might vary significantly (Xu et al., 2011).

77 Gustav was the first major hurricane that made a landfall in Louisiana after Katrina (2005).  
78 It passed through the center of GoM and landed near Cocodrie, Louisiana on September 1<sup>st</sup> of 2008  
79 as a Category 2 hurricane (Forbes et al., 2010). Sediment resuspension and transport were strong  
80 during the passage of Gustav, and thick post-hurricane deposition (up to 40 cm) was simulated on  
81 the inner shelf (Zang et al., 2018) and in the bays (Liu et al., 2018). Korobkin et al. (2009) identified  
82 a post-Gustav algal bloom around the Mississippi Delta using satellite images. High respiration  
83 and stratification after the landfall of Gustav was reported to be connected with hypoxia  
84 development on the shelf (McCarthy et al., 2013). In this study, we built a biogeochemical model  
85 with sediment-induced light attenuation on the hydro- and sediment dynamics of the three-way  
86 coupled (atmospheric-wave-ocean) Gustav model (Zang et al., 2018). It is worth of note that  
87 sediment dynamics can also impact nutrient dynamics via changing the density of  
88 remineralization near the bottom (Moriarty et al., 2018). However, in this study we only  
89 investigated the influence of suspended sediment on optical environment and primary production.  
90 The impact from elevated remineralization of resuspended particular organic matter was not  
91 considered as detailed processes in water column and sediment bed because their relevant  
92 parameterizations during extreme weather events are still largely unknown. Our objectives are to:  
93 1) evaluate the impact of sediment-induced light attenuation on the spatiotemporal variation of  
94 nutrient-phytoplankton dynamics during a hurricane event; 2) explore the driving mechanism of  
95 the post-hurricane bloom on the shelf; and 3) investigate the response of primary production to  
96 sediment optical characteristics and fluvial nutrient input.

## 97 2 Model Description

### 98 2.1 Physical, sediment and biogeochemical models

100 Our model covered the entire GoM (Fig. 1a) and was built on the coupled ocean-  
101 atmosphere-wave-and-sediment transport (COAWST) modeling system (Warner et al., 2008,  
102 2010). COAWST is an open source model platform that consists of three numerical models: the  
103 Weather Research and Forecasting model (WRF; Skamarock et al., 2005), the Regional Ocean  
104 Modeling System (ROMS; Shchepetkin and McWilliams, 2005; Haidvogel et al., 2008), and the  
105 Simulating Waves Nearshore model (SWAN; Booij et al., 1999). The Community Sediment  
106 Transport Modeling System (CSTMS) is included in ROMS to simulate sediment dispersal,  
107 stratigraphy, and geomorphology. Model Coupling Toolkit (MCT; Jacob et al., 2005) enables the  
108 interaction among the three models. Details of model setup and validation of the three-way coupled  
109 hydrodynamic-sediment transport model (WRF-ROMS-SWAN-CSTMS) were described in Zang  
110 et al. (2018). The biogeochemical model in this study was largely built on the North Pacific  
111 Ecosystem Model for Understanding Regional Oceanography (NEMURO; Kishi et al., 2007),  
112 which incorporated both nitrogen and silicon flows. Eleven state variables were included in the  
113 model: nitrate, ammonium, two types of phytoplankton (small and large), three types of  
114 zooplankton (microzooplankton, mesozooplankton and predatory zooplankton), particulate and



115 dissolved nitrogen, particulate silica, and silicic acid concentration. We incorporated two types of  
116 chlorophyll corresponding to the large and small phytoplankton tracers, respectively. The  
117 estimation of chlorophyll concentration was based on Fennel et al. (2006). To get an ideal  
118 parameterization set and a stable initial condition for the biogeochemical variables, we first  
119 conducted a 20-yr (1993–2012) coupled physical-biogeochemical simulation using the same model  
120 domain with the WRF and SWAN models disabled to achieve a feasible computation load (step 1  
121 in Fig. 2). Instead, the atmospheric forcing was provided by the 6-hourly, 38 km horizontal  
122 resolution Climate Forecast System Reanalysis (CFSR; Saha et al., 2010, 2011;  
123 <http://cfs.ncep.noaa.gov>). The physical setup of the 20-yr simulation was the same as Zang et al.  
124 (2019). The biogeochemical parameterizations (Table. S1) were largely adapted after a recent  
125 GoM biogeochemical modeling study by Gomez et al. (2018). Since this study focused on the  
126 response of biogeochemical process to hurricane event, details of the 20-yr simulation setup and  
127 model-observation comparison were provided in the supplementary material. Once validated, the  
128 biogeochemical variables were extracted from the 20-yr model on August 30<sup>th</sup>, 2008 as the initial  
129 condition for the Gustav simulation (step 2 in Fig. 2).

130 The light available for photosynthesis ( $I$ ) is estimated using the following equation:

$$I = I_0 \exp\{-Z[\alpha_w + \alpha_{chl}(PSn + PLn) + \alpha_{sed}SSC]\},$$

133  
134 where  $I_0$  is light intensity at the surface layer, and  $Z$  is water depth.  $\alpha_w$  and  $\alpha_{chl}$  are light  
135 extinction coefficient of sea water and self-shading coefficient, respectively.  $PSn$  and  $PLn$   
136 represent concentrations of small phytoplankton and large phytoplankton. Compared with original  
137 biogeochemical model, we added a new sediment-induced light attenuation term ( $\alpha_{sed}SSC$ ) in this  
138 equation.  $\alpha_{sed}$  is light extinction coefficient due to suspended sediment, and  $SSC$  is total  
139 suspended sediment concentration in the water column. We performed a benchmark run ( $\alpha_{sed} =$   
140 0.059; McSweeney et al., 2017) to represent two scenarios with sediment-induced light attenuation.  
141 The simulation period was from August 30<sup>th</sup> to September 10<sup>th</sup>, 2008.

## 142 2.2 Sensitivity tests

143  
144 High turbidity in the Mississippi River estuary due to fluvial sediment discharge and  
145 resuspension suggested the vital role of sediment in underwater optical environment. To  
146 quantitatively evaluate the importance of suspended sediment in light attenuation, we conducted  
147 a sensitivity test (test 1) without sediment-induced light attenuation term ( $\alpha_{sed} = 0$ ). Since the  
148 physical properties of sediment particle (e.g., size, shape, roughness, and color) determined its  
149 light attenuation efficiency (Baker and Lavelle, 1984; Storlazzi et al., 2015), a wide range of  $\alpha_{sed}$   
150 has been applied in previous studies (e.g., Pennock, 1985; Arndt et al., 2007; McSweeney et al.,  
151 2017). Here we selected  $\alpha_{sed} = 0.075$  (test 2; Pennock, 1985) and  $\alpha_{sed} = 0.025$  (test 3; Van Duin  
152 et al., 2001) to represent high/low attenuation efficiency and examined the sensitivity of primary  
153 production to sediment-induced light attenuation.

## 154 3 Model Validation

155  
156 Direct measurements of ocean conditions during the passage of a hurricane remained a  
157 major challenge. In Zang et al. (2018) we validated the physical model's performance against the  
158 air pressure, sea level, and wave heights recorded at available buoy stations. The sediment model's  
159 performance was evaluated against satellite images. In this study, we used the five-day composites  
160 of SeaWiFS satellite images before (Aug 25<sup>th</sup>–29<sup>th</sup>) and after (September 5<sup>th</sup>–9<sup>th</sup>) Gustav's landing



161 to calibrate our biogeochemical model. The satellite images showed higher chlorophyll  
162 concentration around the bird-foot delta and on the Atchafalaya shelf in the post-hurricane  
163 composite than the pre-hurricane one (Figs. 3a and 3b). Another major difference between the two  
164 composites was identified in the waters between the 50 and 200 m isobaths off the Atchafalaya  
165 Bay: chlorophyll concentration increased from 1 to 4 mg/m<sup>3</sup> after Gustav, indicating a possible  
166 post-hurricane algal bloom on the outer shelf. The intensity of offshore bloom was better  
167 reproduced (~ 4 mg/m<sup>3</sup>) with the new sediment-induced light attenuation algorithm (benchmark  
168 run, see difference between Figs. 3c and 3d). To quantitatively evaluate model's performance, we  
169 calculated the root mean square error (RMSE) and correlation coefficient (R) between model-  
170 simulated and satellite-based chlorophyll concentrations over the inner shelf (water depth < 50 m;  
171 Fig. 4). The reduced RMSE in the benchmark run in comparison to sensitivity test (2.33 to 1.91)  
172 suggested model performance was improved by including sediment-induced light attenuation. The  
173 correlation coefficients were slightly different (0.82 and 0.81), indicating the spatial distributions  
174 of chlorophyll of the two experiments were comparable (Fig. 4). Nevertheless, model's  
175 performance was significantly improved in high productivity waters where chlorophyll  
176 concentration is > 1 mg/m<sup>3</sup>: R increased from 0.55 to 0.61, and RMSE decreases from 5.93 to 3.97  
177 (Fig. 4). The improvement of model results confirmed the significance of sediment-induced light  
178 attenuation in biogeochemical cycling during hurricane Gustav, particularly in coastal regions  
179 where chlorophyll concentration was high.

180

## 181 4 Results and Discussion

### 182 4.1 Temporal variability of biogeochemical variables

183 To examine the temporal variation of biogeochemical variables during the passage of Gustav,  
184 we plotted the time series of spatially averaged net primary production (NPP), surface chlorophyll  
185 concentration, NO<sub>3</sub> concentration, SSC, short wave radiation, and sea surface temperature (SST)  
186 over the nGoM inner shelf (< 50 m water depth; Fig. 5). NPP exhibited strong diel variation and  
187 the peaks were strongly correlated with short wave radiation maximum (Figs. 5a and 5e). Such  
188 diel cycle could also be found in chlorophyll concentration, but with a 3 to 4-hour delay (Fig. 5b).  
189 Before the approach of Gustav, daily-averaged NPP was around 1 g C/m<sup>2</sup>/day, and the difference  
190 of NPP and chlorophyll concentration between the benchmark run and test 1 were negligible (Fig.  
191 5a).

192 When Gustav landed in coastal Louisiana at 16:00:00 UTC on September 1<sup>st</sup>, surface SSC  
193 went up to 3.8 kg/m<sup>3</sup> because of strong seabed erosion and resuspension (Fig. 5d). Daily-averaged  
194 NPP reduced to 0.7 g C/m<sup>2</sup>/day in test 1. Once sediment-induced light attenuation was included,  
195 daily-averaged NPP further declined to 0.2 g C/m<sup>2</sup>/day, suggesting that light availability severely  
196 limited short-term productivity on the inner shelf. Chlorophyll concentrations in the benchmark  
197 run and test 1 were reduced by 40% when hurricane approached. Hurricane-related surface cooling,  
198 together with decreased light (Figs. 5e and 5f), contributed to the reductions of chlorophyll and  
199 NPP.

200 Daily-averaged NPP difference between the two experiments maximized on September 2<sup>nd</sup>  
201 due to light limitation modulated by resuspended sediments (Figs. 5a and 5d). On September 3<sup>rd</sup>,  
202 daily-averaged NPP of test 1 recovered to 0.9 g C/m<sup>2</sup>/day and was steady through the end of our  
203 simulation (Fig. 5a). For the benchmark run, however, the recovery of NPP was much slower:  
204 daily-averaged NPP was lower than that of test 1 until September 7<sup>th</sup>, when most suspended  
205 sediment settled back onto the seabed. NO<sub>3</sub> concentration went up gradually in the benchmark run  
206 from September 2<sup>nd</sup> to September 7<sup>th</sup> because nutrient consumption was constrained by the



207 declined photosynthesis (Fig. 5c). Accumulated  $\text{NO}_3$ , together with the preferable optical  
208 environment due to low SSC, resulted in higher NPP and algal bloom after September 7<sup>th</sup> (Figs.  
209 5a and 5b).

210

#### 211 4.2 Vertical structure of biogeochemical variables

212 We extracted concentrations of chlorophyll and sediment along the transect D in Rabalais  
213 et al. (2001; location see Fig. 1b) at three time points (August 31<sup>st</sup>, September 2<sup>nd</sup>, and September  
214 10<sup>th</sup>) to represent pre-, during-, and post-hurricane stages, respectively (Fig. 6). Before the  
215 approach of Gustav, chlorophyll concentration decreased seaward from 5 to  $0.3 \text{ mg/m}^3$ , and  
216 sediment-induced light attenuation did not alter the vertical structure of chlorophyll owing to low  
217 SSC in the water column (Figs. 6a–c). On September 2<sup>nd</sup>, strong resuspension elevated the SSC to  
218 more than  $1 \text{ kg/m}^3$  over the entire water column (Fig. 6f). Chlorophyll concentration over the top  
219 40 m in the benchmark run was  $\sim 4 \text{ mg/m}^3$  lower than that in test 1 due to sediment-induced light  
220 attenuation. The most dominant difference between the two simulations occurred nearshore where  
221 the water depth was  $< 20 \text{ m}$  (Figs. 6d and 6e).

222 In test 1, chlorophyll concentration during the post-hurricane stage was lower than that of  
223 the pre-hurricane stage (Figs. 6a and 6g), which contradicted with the condition captured by  
224 satellite images (Figs. 3a and 3b). The benchmark run, however, successfully reproduced the  
225 magnitude and seaward extension of the post-hurricane bloom (Fig. 6h). High chlorophyll  
226 concentration ( $> 1 \text{ mg/m}^3$ ) was simulated in the top 20 m of the water column where sediment  
227 concentration was low after the passage of Gustav (Figs. 6g and 6h). As water depth exceeded 20  
228 m, chlorophyll concentration dropped drastically to less than  $0.1 \text{ mg/m}^3$ . The synchronized high  
229 turbidity (Fig. 6i) and low chlorophyll concentration implied that, nine days after Gustav's landfall,  
230 the primary production in deep water could still be constrained by limited light availability. A  
231 similar vertical structure (high SSC and low chlorophyll at the bottom) was also simulated in the  
232 Delaware estuary, where near bottom productivity was constrained by the estuarine turbidity  
233 maximum (McSweeney et al., 2017). Such a well stratified water column with high/low  
234 productivity at the surface/bottom was in favor of bottom oxygen depletion: elevated surface  
235 phytoplankton growth after hurricane provided more particulate organic matter (POM), which  
236 could sink gradually and be decomposed in the bottom water with high oxygen consumption  
237 (Wiseman et al., 1997). Meanwhile, the post-hurricane stratification recovery in summer and fall  
238 seasons prevented oxygen ventilation to the bottom. Another major process that might further  
239 lower the oxygen level was the high respiration rate caused by resuspended POM (Bianucci et al.,  
240 2018). McCarthy et al. (2013) reported a post-Gustav respiration peak associated with organic  
241 matter resuspension in the bottom boundary layer. A recent numerical model study also supported  
242 substantial increase of near-bottom oxygen consumption due to resuspended POM  
243 remineralization during moderate resuspension events (Moriarty et al., 2018). These existing  
244 studies and the new finding of this study suggested particulate matter (both organic and inorganic)  
245 dynamics might substantially contribute to bottom oxygen depletion and hypoxia development.

246

#### 247 4.3 The post-hurricane offshore bloom

248 Post-hurricane blooms have been widely observed in the mid- and low-latitude oceans  
249 (Davis and Yan, 2004; Miller et al., 2006; Pan et al., 2017). A bloom in the open ocean was usually  
250 isolated and patchy, and its formation was mainly related to nutrients and chlorophyll vertical  
251 mixing (Walker et al., 2005; Pan et al., 2017). The mechanism of the offshore bloom formation on  
252 the outer shelf, however, was more complex due to additional impacts from the inner shelf water.





253 Strong cross-shore transport after hurricane Gustav has been reported by previous studies  
254 (Korobkin et al., 2009; Zang et al., 2018). The seaward dispersal of coastal waters with higher  
255 nutrient and chlorophyll concentrations might potentially result in the outer shelf bloom, while  
256 their respective contributions were still unclear. To quantify the cross-shore exported nutrient and  
257 chlorophyll, we estimated depth integrated offshore (seaward)  $\text{NO}_3$  and chlorophyll flux along the  
258 50 m isobath transect (location see Fig. 1b; Table. 1). Compared with test 1 ( $\text{NO}_3$ : 7.35 mmol  
259 N/m/s; Chlorophyll: 66.88 mg/m/s), the benchmark run simulated a higher  $\text{NO}_3$  flux (38.71 mmol  
260 N/m/s) and a lower chlorophyll flux (43.10 mg/m/s). The differences in  $\text{NO}_3$  and chlorophyll  
261 fluxes between the two simulations could be explained by nutrient accumulation and NPP  
262 reduction on the inner shelf when sediment-induced light attenuation was dominant (Figs. 5a and  
263 5c). Given the better offshore bloom intensity reproduced by the benchmark run (Figs. 3c and 3d),  
264 we concluded that the cross-shore export of previously accumulated nutrient during low light  
265 availability significantly contributed to the post-hurricane offshore bloom.

#### 267 4.4 Sensitivity to sediment light extinction coefficient ( $\alpha_{sed}$ )

268 Sediment light attenuation efficiency was determined by many physical properties of  
269 sediment particle (e.g., size, shape, roughness, and color), which resulted in the great challenge to  
270 reasonably parameterize  $\alpha_{sed}$  over the entire nGoM (Baker and Lavelle, 1984; Storlazzi et al.,  
271 2015). To examine the sensitivity of primary production to sediment light attenuation efficiency,  
272 the results of sensitivity tests with different  $\alpha_{sed}$  (tests 2 and 3) were compared with the benchmark  
273 run.

274 The difference of primary production between benchmark run and sensitivity tests 2 and 3  
275 was limited before the landfall of hurricane Gustav (Fig. 7a). The insensitivity of sediment-induced  
276 light attenuation under normal condition suggested that the nGoM ecosystem was mainly limited  
277 by nutrient rather than light (Fennel et al., 2011). After 2 days of hurricane landfall (Sept 1<sup>st</sup> – 3<sup>rd</sup>),  
278 high SSC due to strong sediment resuspension suppressed photosynthesis in the entire water  
279 column (Fig. 7). The contribution of high SSC overwhelmed that of  $\alpha_{sed}$  to the variation of  
280 sediment-induced light attenuation term ( $\alpha_{sed}SSC$ ). Therefore, the primary production was still  
281 insensitive to  $\alpha_{sed}$  from Sept 1<sup>st</sup> to Sept 3<sup>rd</sup> although the nGoM ecosystem was limited by light  
282 availability. After Sept 3<sup>rd</sup>, the primary production and  $\text{NO}_3$  concentration of test 3 with lower  $\alpha_{sed}$   
283 exceeded those of benchmark run and test 2 until Sept 7<sup>th</sup> (Fig. 7). The sensitivity of primary  
284 production to  $\alpha_{sed}$  during this period was caused by the decreased contribution of SSC to  
285 sediment-induced light attenuation associated with sediment settling (Fig. 5d). In the last two days  
286 of our simulations, the primary production difference turned to be limited again because the nGoM  
287 ecosystem shifted back to a nutrient-limited one.

288 In general, the influence of  $\alpha_{sed}$  was significant as the underwater light for photosynthesis  
289 was limited by sediment-induced light attenuation and sediment concentration was moderately  
290 high. Although this study could not provide a widely accepted SSC range to determine whether  
291  $\alpha_{sed}$  played a vital role in photosynthesis and primary production, it confirmed that the ecosystem  
292 with great variation of sediment concentration were surely affected by  $\alpha_{sed}$ . The optical  
293 environment over the muddy inner Louisiana shelf, for example, was dominated by CDOM and  
294 chlorophyll under normal condition (D'Sa and Miller, 2003). During energetic events (e.g.,  
295 hurricanes, cold fronts), however, high concentration of sediment particle due to strong  
296 resuspension became the most important light absorber. Given high frequency of cold front in  
297 winter and hurricane in summer in the nGoM (Walker and Hamrick, 2000; Fennel et al., 2007),  
298 was reasonable to speculate that coastal Louisiana ecosystem was potentially sensitive to  $\alpha_{sed}$  not



299 only on event scale, but also on annual and decadal scales. To confirm that, the long-term  
300 biogeochemical model studies focusing on the nGoM and Mississippi-Atchafalaya River system  
301 should explicitly include sediment-induced light attenuation in the future to better resolve  
302 photosynthesis and primary production.

#### 304 4.5 Model uncertainties

305 The optical environment over the muddy Louisiana shelf is dominated by phytoplankton,  
306 suspended sediment, CDOM, and detritus particle (Le et al., 2014). So far, the model presented  
307 here only included the light attenuation due to the former two constituents, and the potential  
308 influence from CDOM and detritus warrants future study. Light attenuation due to detritus was  
309 simply parameterized using salinity in the previous model study (Justić and Wang, 2014), yet few  
310 biogeochemical models took light attenuation due to CDOM into account. In the nGoM, CDOM  
311 plays an indispensable role in modulating optical properties of inner shelf waters (D'Sa and Miller,  
312 2003). To include CDOM-induced light attenuation into the biogeochemical models, a long-term  
313 CDOM climatology is required in future studies.

314 We used SeaWiFS-derived chlorophyll concentration to compare with our model results.  
315 However, deriving high quality chlorophyll data during hurricanes is still a challenge because: 1)  
316 thick clouds during hurricane limit the availability and quality of satellite images (Huang et al.,  
317 2011); 2) the uncertainty of chlorophyll estimation can be amplified due to strong CDOM  
318 absorption in the nGoM (D'Sa and Miller, 2003; D'Sa et al., 2006); and 3) conducting chlorophyll  
319 measurements during hurricane to calibrate bio-optical algorithms is still challenging. Given the  
320 rapid change and wide range of sediment and chlorophyll concentrations after hurricane, the  
321 algorithms based on observations under normal conditions might not be valid. To achieve high  
322 quality satellite-derived chlorophyll data for model validation, developing a new algorithm based  
323 on observations during hurricane events becomes essential.

324 In this study we simplified  $\alpha_{sed}$  as a constant over the entire GoM following previous  
325 studies. When water is highly turbid, the availability of light for photosynthesis could be more  
326 related to sediment concentration rather than  $\alpha_{sed}$  (McSweeney et al., 2017). Thus, using a  
327 constant to represent sediment light extinction coefficient when sediment concentration is high  
328 should not introduce considerable uncertainties. The optical characteristics of sediment particle,  
329 however, could greatly modify light availability underwater when SSC is relatively low (Storlazzi  
330 et al., 2015). Our sensitivity tests (section 4.4) also suggest the importance of  $\alpha_{sed}$  in  
331 photosynthesis and primary production when resuspended sediment settled back on the sea floor.  
332 Therefore, it is necessary to apply an optimized  $\alpha_{sed}$  parameterization to the regions where  
333 sediment dominates underwater optical environment.

334 Organic matter remineralization in sediments can dramatically increase nutrient  
335 concentration in the bottom boundary layer during strong resuspension (Couceiro et al., 2013).  
336 Field measurements after hurricanes Gustav and Ike suggested that the resuspension can expose  
337 the organic material in sediments to a more favorable environment for respiration (McCarthy et  
338 al., 2013). Nevertheless, so far most biogeochemical models neglect or simply parameterize this  
339 process (Fennel et al., 2006; Chai et al., 2007; Kishi et al., 2007). Moriarty et al. (2018) developed  
340 a particulate organic matter resuspension model and found remineralization intensity increased by  
341 an order of magnitude during moderate resuspension events in the nGoM. Given the strong storm-  
342 driven resuspension during hurricane, nutrient dynamics can be modified greatly by  
343 remineralization after the storm passage as well. An incorporation of organic matter resuspension





344 and remineralization, together with the light attenuation effects addressed in this study, will  
345 complete our understanding of hurricane's impact on the biogeochemical cycling in shelf waters.

346 Our biogeochemical model only included freshwater and terrestrial nutrient input via river  
347 channel, while the importance of enhanced surface runoff and groundwater was not considered in  
348 our simulation. Du et al. (2019) estimated freshwater budget and found that surface runoff and  
349 groundwater accounted for ~34% of total freshwater load during hurricane Harvey. Although our  
350 understanding about nutrient flux associated with these two types of freshwater input is still limited,  
351 excluding surface runoff and groundwater flux in the model implies our underestimation of  
352 terrestrial nutrient discharge into the nGoM. Coupling groundwater and hydrology models with  
353 marine biogeochemical model in coastal regions is a feasible way to help us better understand the  
354 response of shelf ecosystem to terrestrial input.

## 355 **5 Conclusions**

357 We introduced a sediment-induced light attenuation algorithm to the coupled physical-  
358 biogeochemical model on the platform of ROMS. The new model reproduced the biogeochemical  
359 cycling during hurricane Gustav in the northern Gulf of Mexico. Improved model performance  
360 emphasized the importance of sediment in underwater optical environment and primary production  
361 during extreme weather events. During the passage of Gustav, the high SSC turned the inner shelf  
362 from a nutrient-limited environment to a light-limited one. NPP reduced from 1 to 0.2 g C/m<sup>2</sup>/day.  
363 Due to the shading effect of resuspended sediment, the NPP recovered to pre-hurricane condition  
364 after one week of hurricane landing. As sediments further settled back on the seabed, nutrient  
365 accumulation and increased light availability incurred a strong surface post-hurricane bloom on  
366 the inner shelf. Nine days after Gustav's landing, the primary production below 20 m was still  
367 light-limited due to the unsettled sediments. The post-hurricane stratification, enhanced surface  
368 primary production, and other processes (e.g., respiration, remineralization) might intensify  
369 oxygen depletion and hypoxia formation in the shelf water. The post-hurricane bloom on the outer  
370 shelf was significantly enhanced by the laterally transported nutrients from the inner shelf.  
371 Suspended sediment affected primary production when SSC was moderately high after the landfall  
372 of Gustav. For those aquatic environments with great spatiotemporal variation of SSC (e.g.,  
373 estuaries and lagoons), an optimal parameterization of sediment-induced light attenuation is  
374 imperative to better evaluate extreme weather events' impact on underwater productivity and  
375 biogeochemical cycling.

## 376 **Acknowledgements**

378 This study has been supported by NSF CyberSEES Award CCF-1856359, NASA (award number  
379 NNH17ZHA002C), Louisiana Board of Regents (award number NASA/LEQSF(2018-20)-  
380 Phase3-11), NSF Coastal SEES Award 1427389, and the LSU Foundation Billy and Ann Harrison  
381 Endowment for Sedimentary Geology. Computational support was provided by the High  
382 Performance Computing Facility (cluster Supermike II) at Louisiana State University. Model  
383 results used in this study are available at the LSU mass storage system and detailed information  
384 regarding the data set is posted on the homepage of Coupled Ocean Modeling Group  
385 (<http://www.oceanography.lsu.edu/xuelab>). Data request can be sent to the corresponding author  
386 via this webpage.

## 387 **References**

389



- 390 Allison, M.A., Demas, C.R., Ebersole, B.A., Kleiss, B.A., Little, C.D., Meselhe, E.A., Powell,  
391 N.J., Pratt, T.C., Vosburg, B.M., 2012. A water and sediment budget for the lower  
392 Mississippi-Atchafalaya River in flood years 2008-2010: Implications for sediment  
393 discharge to the oceans and coastal restoration in Louisiana. *J. Hydrol.* 432–433, 84–97.  
394 <https://doi.org/10.1016/j.jhydrol.2012.02.020>
- 395 Arndt, S., Vanderborght, J., Regnier, P., 2007. Diatom growth response to physical forcing in a  
396 macrotidal estuary: Coupling hydrodynamics, sediment transport, and biogeochemistry. *J.*  
397 *Geophys. Res. Ocean.* 112.
- 398 Baker, E.T., Lavelle, J.W., 1984. Effect of Particle Size on the Light Attenuation Coefficient of  
399 Natural Suspensions. *J. Geophys. Res.* 89, 8197–8203.  
400 <https://doi.org/10.1029/JC089iC05p08197>
- 401 Bianucci, L., Balaguru, K., Smith, R.W., Leung, L.R., Moriarty, J.M., 2018. Contribution of  
402 hurricane-induced sediment resuspension to coastal oxygen dynamics. *Sci. Rep.* 8.  
403 <https://doi.org/10.1038/s41598-018-33640-3>
- 404 Bierman, V.J., Hinz, S.C., Zhu, D., Wiseman, W.J., Rabalais, N.N., Turner, R.E., 1994. A  
405 preliminary mass balance model of primary productivity and dissolved oxygen in the  
406 Mississippi River plume/inner Gulf Shelf region. *Estuaries* 17, 886–899.
- 407 Booij, N., Ris, R.C., Holthuijsen, L.H., 1999. A third-generation wave model for coastal regions:  
408 1. Model description and validation. *J. Geophys. Res. Ocean.* 104, 7649–7666.
- 409 Chai, F., Jiang, M.S., Chao, Y., Dugdale, R.C., Chavez, F., Barber, R.T., 2007. Modeling  
410 responses of diatom productivity and biogenic silica export to iron enrichment in the  
411 equatorial Pacific Ocean. *Global Biogeochem. Cycles* 21, 1–16.  
412 <https://doi.org/10.1029/2006GB002804>
- 413 Cloern, J.E., 1987. Turbidity as a control on phytoplankton biomass and productivity in  
414 estuaries. *Cont. Shelf Res.* 7, 1367–1381.
- 415 Couceiro, F., Fones, G.R., Thompson, C.E.L., Statham, P.J., Sivy, D.B., Parker, R., Kelly-  
416 Gerreyn, B.A., Amos, C.L., 2013. Impact of resuspension of cohesive sediments at the  
417 Oyster Grounds (North Sea) on nutrient exchange across the sediment-water interface.  
418 *Biogeochemistry* 113, 37–52. <https://doi.org/10.1007/s10533-012-9710-7>
- 419 D'Sa, E.J., Korobkin, M., Ko, D.S., 2011. Effects of Hurricane Ike on the Louisiana-Texas coast  
420 from satellite and model data. *Remote Sens. Lett.* 2, 11–19.  
421 <https://doi.org/10.1080/01431161.2010.489057>
- 422 D'Sa, E.J., Miller, R.L., 2003. Bio-optical properties in waters influenced by the Mississippi  
423 River during low flow conditions. *Remote Sens. Environ.* 84, 538–549.  
424 [https://doi.org/10.1016/S0034-4257\(02\)00163-3](https://doi.org/10.1016/S0034-4257(02)00163-3)
- 425 D'Sa, E.J., Miller, R.L., Del Castillo, C., 2006. Bio-optical properties and ocean color algorithms  
426 for coastal waters influenced by the Mississippi River during a cold front. *Appl. Opt.* 45,  
427 7410–7428.
- 428 Davis, A., Yan, X.H., 2004. Hurricane forcing on chlorophyll-a concentration off the northeast  
429 coast of the U.S. *Geophys. Res. Lett.* 31, 4–7. <https://doi.org/10.1029/2004GL020668>
- 430 Devlin, M.J., Barry, J., Mills, D.K., Gowen, R.J., Foden, J., Sivy, D., Tett, P., 2008.  
431 Relationships between suspended particulate material, light attenuation and Secchi depth in  
432 UK marine waters. *Estuar. Coast. Shelf Sci.* 79, 429–439.  
433 <https://doi.org/10.1016/j.ecss.2008.04.024>



- 434 Du, J., Park, K., Dellapenna, T.M., Clay, J.M., 2019. Dramatic hydrodynamic and sedimentary  
435 responses in Galveston Bay and adjacent inner shelf to Hurricane Harvey. *Sci. Total*  
436 *Environ.* 653, 554–564. <https://doi.org/10.1016/j.scitotenv.2018.10.403>
- 437 Fennel, K., Hetland, R., Feng, Y., Dimarco, S., 2011. A coupled physical-biological model of the  
438 Northern Gulf of Mexico shelf: Model description, validation and analysis of phytoplankton  
439 variability. *Biogeosciences* 8, 1881–1899. <https://doi.org/10.5194/bg-8-1881-2011>
- 440 Fennel, K., Wilkin, J., Levin, J., Moisan, J., O'Reilly, J., Haidvogel, D., 2006. Nitrogen cycling  
441 in the Middle Atlantic Bight: Results from a three-dimensional model and implications for  
442 the North Atlantic nitrogen budget. *Global Biogeochem. Cycles* 20, 1–14.  
443 <https://doi.org/10.1029/2005GB002456>
- 444 Fennel, K., Wilkin, J., Previdi, M., Najjar, R., 2008. Denitrification effects on air-sea CO<sub>2</sub> flux  
445 in the coastal ocean: Simulations for the northwest North Atlantic. *Geophys. Res. Lett.* 35,  
446 1–5. <https://doi.org/10.1029/2008GL036147>
- 447 Forbes, C., Luettich, R. a., Mattocks, C. a., Westerink, J.J., 2010. A Retrospective Evaluation of  
448 the Storm Surge Produced by Hurricane Gustav (2008): Forecast and Hindcast Results.  
449 *Weather Forecast.* 25, 1577–1602. <https://doi.org/10.1175/2010WAF2222416.1>
- 450 Ganju, N.K., Miselis, J.L., Aretxabaleta, A.L., 2014. Physical and biogeochemical controls on  
451 light attenuation in a eutrophic, back-barrier estuary. *Biogeosciences* 11, 7193–7205.  
452 <https://doi.org/10.5194/bg-11-7193-2014>
- 453 Gomez, F.A., Lee, S.K., Liu, Y., Hernandez, F.J., Muller-Karger, F.E., Lamkin, J.T., 2018.  
454 Seasonal patterns in phytoplankton biomass across the northern and deep Gulf of Mexico: A  
455 numerical model study. *Biogeosciences* 15, 3561–3576. <https://doi.org/10.5194/bg-15-3561-2018>
- 457 Haidvogel, D.B., Arango, H., Budgell, W.P., Cornuelle, B.D., Curchitser, E., Di Lorenzo, E.,  
458 Fennel, K., Geyer, W.R., Hermann, A.J., Lanerolle, L., Levin, J., McWilliams, J.C., Miller,  
459 A.J., Moore, A.M., Powell, T.M., Shchepetkin, A.F., Sherwood, C.R., Signell, R.P.,  
460 Warner, J.C., Wilkin, J., 2008. Ocean forecasting in terrain-following coordinates:  
461 Formulation and skill assessment of the Regional Ocean Modeling System. *J. Comput.*  
462 *Phys.* 227, 3595–3624. <https://doi.org/10.1016/j.jcp.2007.06.016>
- 463 Huang, W., Mukherjee, D., Chen, S., 2011. Assessment of Hurricane Ivan impact on  
464 chlorophyll-a in Pensacola Bay by MODIS 250m remote sensing. *Mar. Pollut. Bull.* 62,  
465 490–498. <https://doi.org/10.1016/j.marpolbul.2010.12.010>
- 466 Hurst, N.R., White, J.R., Xu, K., Ren, M., 2019. Nitrate reduction rates in sediments  
467 experiencing turbulent flow conditions. *Ecol. Eng.* 128, 33–38.  
468 <https://doi.org/10.1016/j.ecoleng.2018.12.027>
- 469 Jacob, R., Larson, J., Everest, O., 2005. M x N Communication and Parallel Interpolation in  
470 Community Climate System Model Version 3 Using the Model Coupling Toolkit. *Int. J.*  
471 *High Perform. Comput. Appl.* 19, 293–307. <https://doi.org/10.1177/1094342005056116>
- 472 Justić, D., Wang, L., 2014. Assessing temporal and spatial variability of hypoxia over the inner  
473 Louisiana-upper Texas shelf: Application of an unstructured-grid three-dimensional coupled  
474 hydrodynamic-water quality model. *Cont. Shelf Res.* 72, 163–179.  
475 <https://doi.org/10.1016/j.csr.2013.08.006>
- 476 Keim, B.D., Muller, R.A., Stone, G.W., 2007. Spatiotemporal patterns and return periods of  
477 tropical storm and hurricane strikes from Texas to Maine. *J. Clim.* 20, 3498–3509.  
478 <https://doi.org/10.1175/JCLI4187.1>



- 479 Kishi, M.J., Kashiwai, M., Ware, D.M., Megrey, B.A., Eslinger, D.L., Werner, F.E., Noguchi-  
480 Aita, M., Azumaya, T., Fujii, M., Hashimoto, S., 2007. NEMURO—a lower trophic level  
481 model for the North Pacific marine ecosystem. *Ecol. Modell.* 202, 12–25.
- 482 Korobkin, M., D'Sa, E., Ko, D.S., 2009. Satellite observations and NCOM assessment of the  
483 Mississippi-Louisiana-Texas coast following hurricanes Gustav and Ike. *Ocean.* 2009 1–4.  
484 <https://doi.org/10.23919/OCEANS.2009.5422213>
- 485 Laurent, A., Fennel, K., Hu, J., Hetland, R., 2012. Simulating the effects of phosphorus  
486 limitation in the Mississippi and Atchafalaya river plumes. *Biogeosciences* 9, 4707–4723.  
487 <https://doi.org/10.5194/bg-9-4707-2012>
- 488 Le, C., Lehrter, J.C., Hu, C., Murrell, M.C., Qi, L., 2014. Spatiotemporal chlorophyll-a dynamics  
489 on the Louisiana continental shelf derived from a dual satellite imagery algorithm. *J.*  
490 *Geophys. Res. Ocean.* 119, 7449–7462.
- 491 Lin, S., Zou, T., Gao, H., Guo, X., 2009. The vertical attenuation of irradiance as a function of  
492 turbidity: a case of the Huanghai (Yellow) Sea in spring. *Acta Oceanol. Sin.* 28, 66–75.
- 493 Liu, K., Chen, Q., Hu, K., Xu, K., Twilley, R.R., 2018. Modeling hurricane-induced wetland-bay  
494 and bay-shelf sediment fluxes. *Coast. Eng.* 135, 77–90.  
495 <https://doi.org/10.1016/j.coastaleng.2017.12.014>
- 496 McCarthy, M.J., Carini, S.A., Liu, Z., Ostrom, N.E., Gardner, W.S., 2013. Oxygen consumption  
497 in the water column and sediments of the northern Gulf of Mexico hypoxic zone. *Estuar.*  
498 *Coast. Shelf Sci.* 123, 46–53. <https://doi.org/10.1016/j.ecss.2013.02.019>
- 499 McSweeney, J.M., Chant, R.J., Wilkin, J.L., Sommerfield, C.K., 2017. Suspended-Sediment  
500 Impacts on Light-Limited Productivity in the Delaware Estuary. *Estuaries and Coasts* 40,  
501 977–993. <https://doi.org/10.1007/s12237-016-0200-3>
- 502 Meade, R.H., Moody, J.A., 2010. Causes for the decline of suspended-sediment discharge in the  
503 Mississippi River system, 1940-2007. *Hydrol. Process.* 24, 35–49.
- 504 Miller, W.D., Harding, L.W., Adolf, J.E., 2006. Hurricane Isabel generated an unusual fall  
505 bloom in Chesapeake Bay. *Geophys. Res. Lett.* 33, 2–5.  
506 <https://doi.org/10.1029/2005GL025658>
- 507 Moriarty, J.M., Harris, C.K., Fennel, K., Friedrichs, M.A.M., Xu, K., Rabouille, C., 2017. The  
508 roles of resuspension, diffusion and biogeochemical processes on oxygen dynamics  
509 offshore of the Rhône River, France: A numerical modeling study. *Biogeosciences* 14,  
510 1919–1946. <https://doi.org/10.5194/bg-14-1919-2017>
- 511 Moriarty, J.M., Harris, C.K., Friedrichs, M.A.M., Fennel, K., Xu, K., 2018. Impact of seabed  
512 resuspension on oxygen and nitrogen dynamics in the northern Gulf of Mexico: A  
513 numerical modeling study. *J. Geophys. Res. Ocean.* 1–27.  
514 <https://doi.org/10.1029/2018JC013950>
- 515 Pan, G., Chai, F., Tang, D.L., Wang, D., 2017. Marine phytoplankton biomass responses to  
516 typhoon events in the South China Sea based on physical-biogeochemical model. *Ecol.*  
517 *Modell.* 356, 38–47. <https://doi.org/10.1016/j.ecolmodel.2017.04.013>
- 518 Pennock, J.R., 1985. Chlorophyll distributions in the Delaware estuary: regulation by light-  
519 limitation. *Estuar. Coast. Shelf Sci.* 21, 711–725.
- 520 Rabalais, N.N., Turner, R.E., Wiseman, W.J., 2001. Hypoxia in the Gulf of Mexico. *J. Environ.*  
521 *Qual.* 30, 320–329.
- 522 Saha, S., Moorthi, S., Pan, H.L., Wu, X., Wang, J., Nadiga, S., Tripp, P., Kistler, R., Woollen, J.,  
523 Behringer, D., 2010. NCEP climate forecast system reanalysis (CFSR) 6-hourly products,



- 524 January 1979 to December 2010. Res. Data Arch. Natl. Cent. Atmos. Res. Comput. Inf.  
525 Syst. Lab. Boulder, CO.
- 526 Saha, S., Moorthi, S., Wu, X., Wang, J., Nadiga, S., Tripp, P., Behringer, D., Hou, Y.T., Chuang,  
527 H., Iredell, M., 2011. NCEP climate forecast system version 2 (CFSv2) 6-hourly products.  
528 Res. Data Arch. Natl. Cent. Atmos. Res. Comput. Inf. Syst. Lab.
- 529 Schaeffer, B.A., Sinclair, G.A., Lehrter, J.C., Murrell, M.C., Kurtz, J.C., Gould, R.W., Yates,  
530 D.F., 2011. An analysis of diffuse light attenuation in the northern Gulf of Mexico hypoxic  
531 zone using the SeaWiFS satellite data record. Remote Sens. Environ. 115, 3748–3757.  
532 <https://doi.org/10.1016/j.rse.2011.09.013>
- 533 Shchepetkin, A.F., McWilliams, J.C., 2005. The regional oceanic modeling system (ROMS): A  
534 split-explicit, free-surface, topography-following-coordinate oceanic model. Ocean Model.  
535 9, 347–404. <https://doi.org/10.1016/j.ocemod.2004.08.002>
- 536 Skamarock, W.C., Klemp, J.B., Dudhi, J., Gill, D.O., Barker, D.M., Duda, M.G., Huang, X.-Y.,  
537 Wang, W., Powers, J.G., 2005. A Description of the Advanced Research WRF Version 3.  
538 Tech. Rep. 113. <https://doi.org/10.5065/D6DZ069T>
- 539 Storlazzi, C.D., Norris, B.K., Rosenberger, K.J., 2015. The influence of grain size, grain color,  
540 and suspended-sediment concentration on light attenuation: Why fine-grained terrestrial  
541 sediment is bad for coral reef ecosystems. Coral Reefs 34, 967–975.  
542 <https://doi.org/10.1007/s00338-015-1268-0>
- 543 Tweel, A.W., Turner, R.E., 2012. Landscape-Scale Analysis of Wetland Sediment Deposition  
544 from Four Tropical Cyclone Events. PLoS One 7.  
545 <https://doi.org/10.1371/journal.pone.0050528>
- 546 Van Duin, E.H.S., Blom, G., Los, F.J., Maffione, R., Zimmerman, R., Cerco, C.F., Dortch, M.,  
547 Best, E.P.H., 2001. Modeling underwater light climate in relation to sedimentation,  
548 resuspension, water quality and autotrophic growth. Hydrobiologia 444, 25–42.  
549 <https://doi.org/10.1023/A:1017512614680>
- 550 Walker, N.D., Hammack, A.B., 2000. Impacts of winter storms on circulation and sediment  
551 transport: Atchafalaya-Vermilion Bay region, Louisiana, USA. J. Coast. Res. 16, 996–1010.  
552 <https://doi.org/10.2307/4300118>
- 553 Walker, N.D., Leben, R.R., Balasubramanian, S., 2005. Hurricane-forced upwelling and  
554 chlorophyll a enhancement within cold-core cyclones in the Gulf of Mexico. Geophys. Res.  
555 Lett. 32, 1–5. <https://doi.org/10.1029/2005GL023716>
- 556 Warner, J.C., Armstrong, B., He, R., Zambon, J.B., 2010. Development of a Coupled Ocean-  
557 Atmosphere-Wave-Sediment Transport (COAWST) Modeling System. Ocean Model. 35,  
558 230–244. <https://doi.org/10.1016/j.ocemod.2010.07.010>
- 559 Warner, J.C., Sherwood, C.R., Signell, R.P., Harris, C.K., Arango, H.G., 2008. Development of a  
560 three-dimensional, regional, coupled wave, current, and sediment-transport model. Comput.  
561 Geosci. 34, 1284–1306. <https://doi.org/10.1016/j.cageo.2008.02.012>
- 562 Wilson, R.F., Fennel, K., Paul Mattern, J., 2013. Simulating sediment-water exchange of  
563 nutrients and oxygen: A comparative assessment of models against mesocosm observations.  
564 Cont. Shelf Res. 63, 69–84. <https://doi.org/10.1016/j.csr.2013.05.003>
- 565 Wiseman, W.J., Rabalais, N.N., Turner, R.E., Dinnel, S.P., MacNaughton, A., 1997. Seasonal  
566 and interannual variability within the Louisiana coastal current: stratification and hypoxia.  
567 J. Mar. Syst. 12, 237–248.





- 568 Xu, K., Harris, C.K., Hetland, R.D., Kaihatu, J.M., 2011. Dispersal of Mississippi and  
569 Atchafalaya sediment on the Texas-Louisiana shelf: Model estimates for the year 1993.  
570 Cont. Shelf Res. 31, 1558–1575. <https://doi.org/10.1016/j.csr.2011.05.008>  
571 Xu, K., Mickey, R.C., Chen, Q., Harris, C.K., Hetland, R.D., Hu, K., Wang, J., 2016. Shelf  
572 sediment transport during hurricanes Katrina and Rita. Comput. Geosci. 90, 24–39.  
573 <https://doi.org/10.1016/j.cageo.2015.10.009>  
574 Xue, Z., He, R., Fennel, K., Cai, W.J., Lohrenz, S., Hopkinson, C., 2013. Modeling ocean  
575 circulation and biogeochemical variability in the Gulf of Mexico. Biogeosciences 10, 7219–  
576 7234. <https://doi.org/10.5194/bg-10-7219-2013>  
577 Yu, L., Fennel, K., Laurent, A., 2015. A modeling study of physical controls on hypoxia  
578 generation in the northern Gulf of Mexico. J. Geophys. Res. Ocean. 1–16.  
579 <https://doi.org/10.1002/2014JC010472>.  
580 Zang, Z., Xue, Z.G., Bao, S., Chen, Q., Walker, N.D., Haag, A.S., Ge, Q., Yao, Z., 2018.  
581 Numerical study of sediment dynamics during hurricane Gustav. Ocean Model. 126, 29–42.  
582 <https://doi.org/10.1016/j.ocemod.2018.04.002>  
583 Zang, Z., Xue, Z.G., Xu, K., Bentley, S.J., Chen, Q., D'Sa, E.J., Ge, Q., 2019. A Two Decadal  
584 (1993–2012) Numerical Assessment of Sediment Dynamics in the Northern Gulf of  
585 Mexico. Water 11, 938.  
586 Zhu, Z., Ng, W., Liu, S., Zhang, J., Chen, J., Wu, Y., 2009. Estuarine phytoplankton dynamics  
587 and shift of limiting factors: A study in the Changjiang (Yangtze River) Estuary and  
588 adjacent area. Estuar. Coast. Shelf Sci. 84, 393–401.  
589



590 **Figure 1.** panel a: Model domains applied in this study. The entire panel a is WRF model domain  
591 (6 km resolution) overlaid with water depth (color-shading). The black solid line represents model  
592 grid used by ROMS and SWAN with 5 km resolution. The black dashed line box (lat: 27°N–31°N;  
593 lon: 94°W–86°W) covers the northern Gulf of Mexico (nGoM). More details in the nGoM are  
594 shown in panel b. The thick purple/red lines indicate locations of 50m-isobath transect and transect  
595 D (Rabalais et al., 2001), respectively.

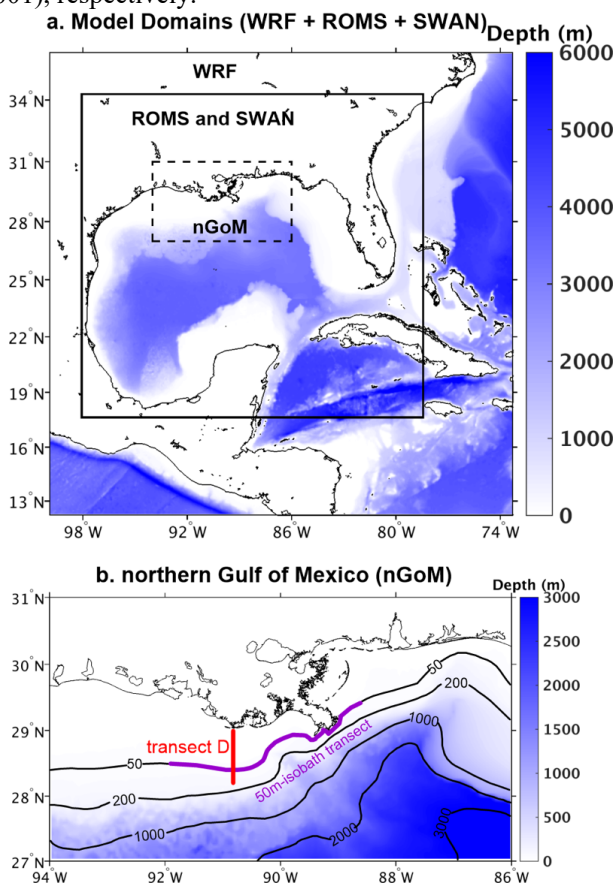

596  
597



598 **Figure 2.** Flow chart of long-term (20 years) and hurricane (11 days) simulations. In step 1 we  
599 only run ocean (ROMS) and biogeochemical (NEMURO) models, which provide initial inputs for  
600 the next step. Step 2 couples ocean (ROMS), wave (SWAN), atmosphere (WRF), sediment  
601 (CSTMS) and new biogeochemical (NEMURO) models with new sediment-induced light  
602 attenuation term.

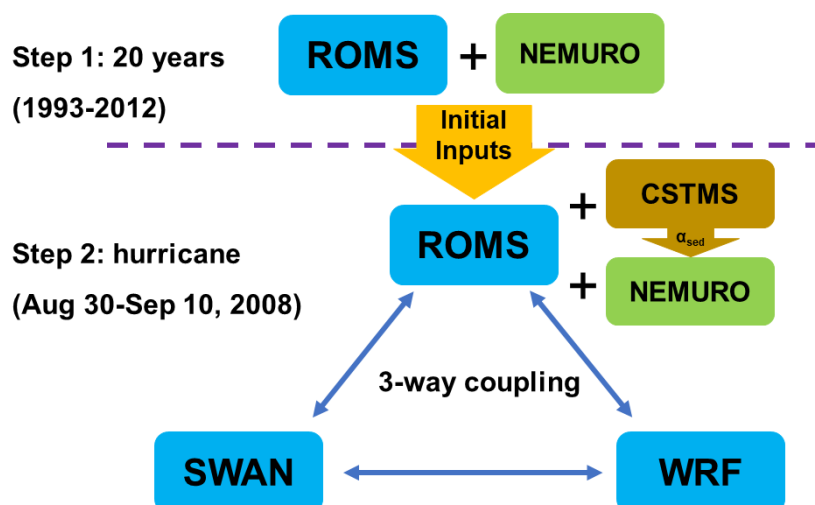

603  
604



605 **Figure 3.** Five-day composite of surface chlorophyll concentration in the year 2008: (a) SeaWiFS  
606 data before Gustav (August 25<sup>th</sup>–29<sup>th</sup>); (b) SeaWiFS data after Gustav (September 05<sup>th</sup>–09<sup>th</sup>); (c)  
607 benchmark run result ( $\alpha_{sed} = 0.059$ ) after Gustav; (d) test 1 result ( $\alpha_{sed} = 0$ ) after Gustav. White  
608 color in panels (a) and (b) represents no data available. Magenta curve shows hurricane track in  
609 panels b, c, and d. (BD: bird-foot delta; AS: Atchafalaya shelf).  
610

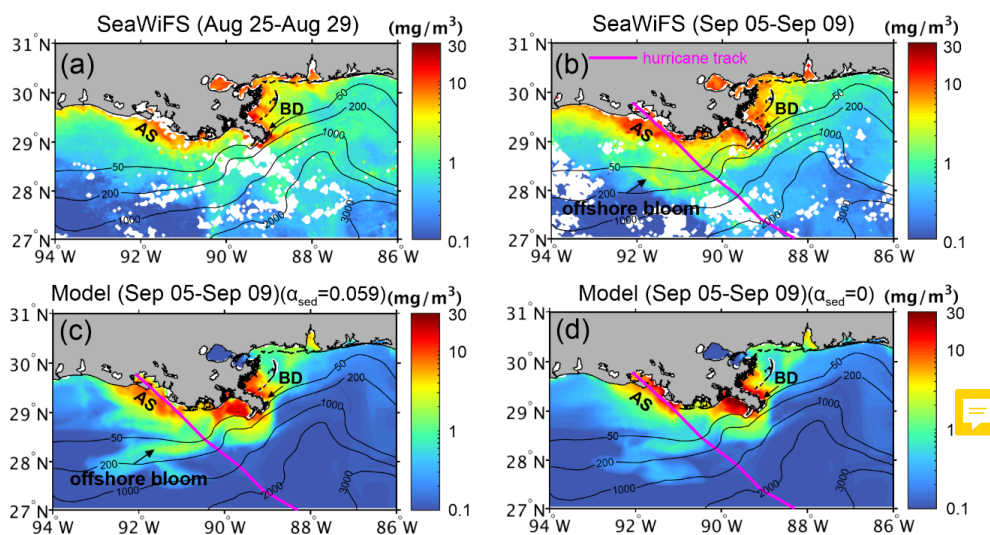

611  
612

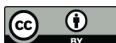

613 **Figure 4.** Simulated five-day composite (September 05<sup>th</sup>–09<sup>th</sup>) of surface chlorophyll  
614 concentration after hurricane Gustav in comparison with corresponding SeaWiFS-derived surface  
615 chlorophyll results over the northern Gulf of Mexico inner shelf ( $h < 50$  m). Model results is based  
616 on the benchmark run ( $\alpha_{sed} = 0.059$ ) in panel a and test 1 ( $\alpha_{sed} = 0$ ) in panel b.

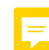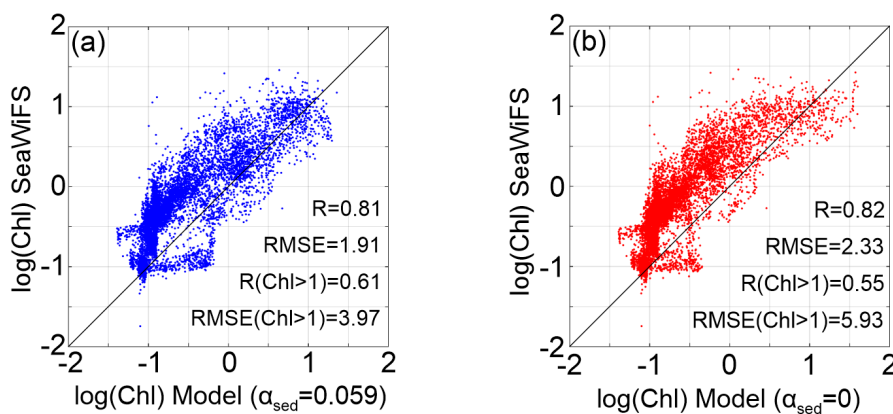

617  
618





619 **Figure 5.** Time series of spatial averaged (inner shelf) net primary production (a), surface  
620 chlorophyll concentration (b),  $\text{NO}_3^-$  concentration (c), suspended sediment concentration (d),  
621 shortwave radiation (e), and sea surface temperature (f). In panels a, b, and c, blue represents  
622 benchmark run ( $\alpha_{sed} = 0.059$ ) and red represents test 1 ( $\alpha_{sed} = 0$ ). Dots in panel a are daily-  
623 averaged net primary production. The black dashed line shows Gustav landfall time.  
624

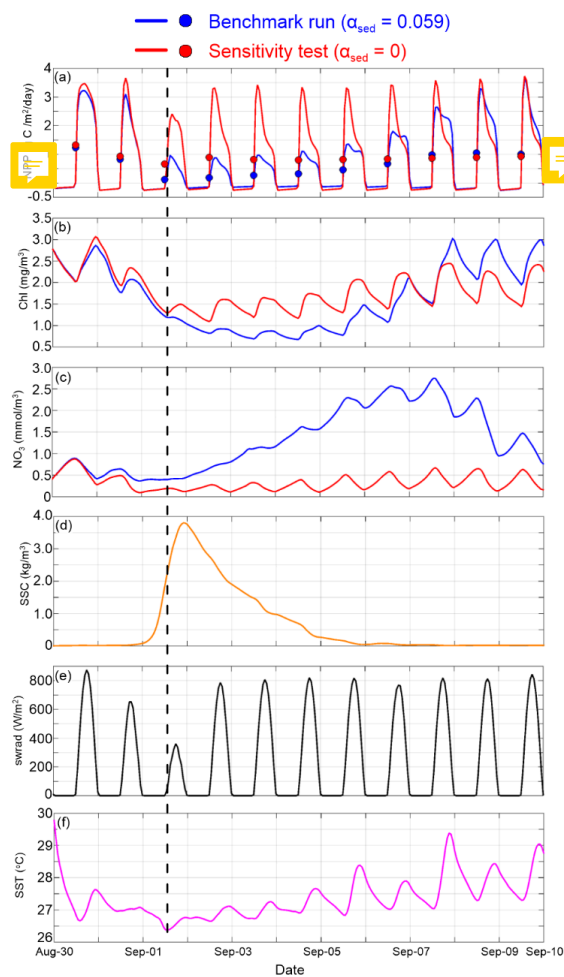

625  
626



627 **Figure 6.** Model simulated chlorophyll and suspended sediment concentration along transect D on  
628 August 31<sup>st</sup> (first row), September 2<sup>nd</sup> (second row), and September 10<sup>th</sup> (third row). The first and  
629 second columns represent chlorophyll concentrations of the test 1 and benchmark run, respectively  
630 (note the color scale is different from Fig. 1). The third column shows suspended sediment  
631 concentration.  
632

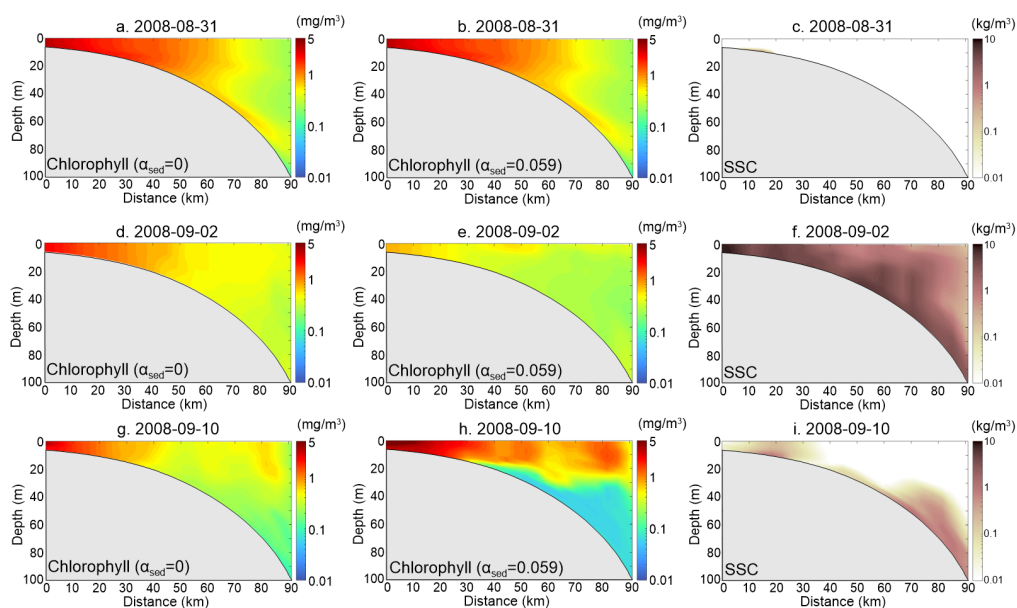

633  
634



635 **Figure 7.** Comparison of spatial averaged (inner shelf) net primary production (panel a) and  $\text{NO}_3$   
636 concentration (panel b) between benchmark run (blue) and sensitivity tests with different  $\alpha_{\text{sed}}$  (test  
637 2: orange; test 3: cyan). The black dashed line shows Gustav landfall time.  
638

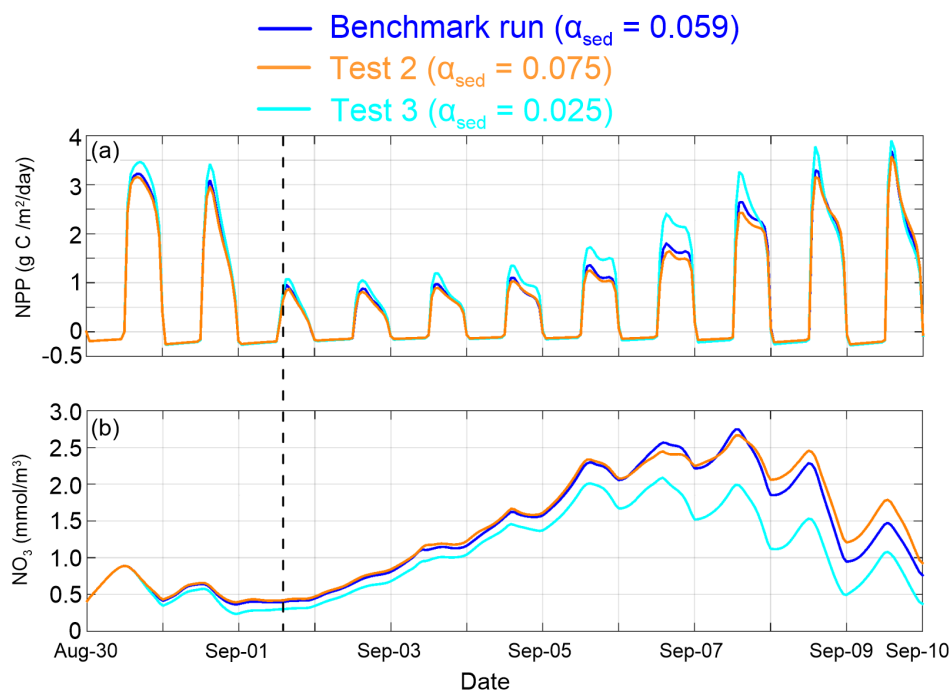

639  
640



641 **Table 1.** Offshore fluxes of NO<sub>3</sub> and chlorophyll along 50 m isobath transect (location see Fig.  
642 1b).  
643

|                                          | Net offshore NO <sub>3</sub> flux<br>(mmol N/m/s) | Net offshore Chl flux<br>(mg/m/s) |
|------------------------------------------|---------------------------------------------------|-----------------------------------|
| benchmark run ( $\alpha_{sed} = 0.059$ ) | 38.71                                             | 43.10                             |
| test 1 ( $\alpha_{sed} = 0$ )            | 7.35                                              | 66.88                             |

644
